# Supplementary material for: Sodium difluorophosphate: facile synthesis, structure, and electrochemical behavior as an additive for sodium-ion batteries
Source: Royal Society of Chemistry journal article supplement (doi:10.1039/d0ta11689k), 2021-01-01
Supplement: d0ta11689k1.pdf [file d0ta11689k1.pdf]

## Electronic Supplementary Information

### **Sodium Difluorophosphate: Facile Synthesis, Structure, and Electrochemical Behavior as an Additive for Sodium-ion Batteries**

*Huan Yang,<sup>a</sup> Jinkwang Hwang,<sup>a</sup> Yuto Tonouchi,<sup>a</sup> Kazuhiko Matsumoto,<sup>\*ab</sup> Rika Hagiwara<sup>ab</sup>*

<sup>a</sup> Graduate School of Energy Science, Kyoto University, Sakyo-ku, Kyoto 606-8501, Japan

<sup>b</sup> Unit of Elements Strategy Initiative for Catalysts & Batteries (ESICB), Kyoto University, Katsura, Kyoto 615-8510, Japan

\*Corresponding author: E-mail: [k-matsumoto@energy.kyoto-u.ac.jp](mailto:k-matsumoto@energy.kyoto-u.ac.jp)

**Table S1** Summary of crystallographic data and refinement results for NaDFP.

|                                           | NaDFP                            |
|-------------------------------------------|----------------------------------|
| formula                                   | NaPO <sub>2</sub> F <sub>2</sub> |
| fw                                        | 123.96                           |
| <i>T</i> / K                              | 113                              |
| crystal system                            | triclinic                        |
| space group                               | <i>P</i> -1                      |
| <i>a</i> / Å                              | 6.708(5)                         |
| <i>b</i> / Å                              | 6.844(6)                         |
| <i>c</i> / Å                              | 8.540(7)                         |
| $\alpha$ / °                              | 63.937(17)                       |
| $\beta$ / °                               | 78.750(13)                       |
| $\gamma$ / °                              | 83.826(17)                       |
| <i>V</i> / Å <sup>3</sup>                 | 343.3(5)                         |
| <i>Z</i>                                  | 4                                |
| $\rho_{\text{calc}}$ / g cm <sup>-3</sup> | 2.385                            |
| $\mu$ / mm <sup>-1</sup>                  | 0.804                            |
| <i>R</i> <sub>1</sub> <sup>a</sup>        | 0.0369                           |
| <i>wR</i> <sub>2</sub> <sup>b</sup>       | 0.1062                           |
| cryst size / mm <sup>3</sup>              | 0.30×0.10×0.10                   |

<sup>a</sup> $R_1 = \Sigma||F_o| - |F_c||/\Sigma|F_o|$ .

<sup>b</sup> $wR_2 = [\Sigma w(F_o^2 - F_c^2)^2/\Sigma w(F_o^2)^2]^{1/2}$ .

**Table S2** Selected bond lengths (Å) and angles (°) in NaDFP.

| bond length (Å) |          | bond angles (°) |            |
|-----------------|----------|-----------------|------------|
| P1-O1           | 1.471(3) | O2-P1-O1        | 121.38(16) |
| P1-O2           | 1.466(3) | O2-P1-F1        | 109.86(16) |
| P1-F1           | 1.548(2) | O1-P1-F1        | 108.68(14) |
| P1-F2           | 1.557(2) | O2-P1-F2        | 109.52(13) |
| P2-O3           | 1.466(3) | O1-P1-F2        | 107.20(14) |
| P2-O4           | 1.467(3) | F1-P1-F2        | 97.54(13)  |
| P2-F3           | 1.562(3) | O3-P2-O4        | 121.87(16) |
| P2-F4           | 1.555(2) | O3-P2-F4        | 108.79(14) |
|                 |          | O3-P2-F3        | 108.53(15) |
|                 |          | O4-P2-F4        | 109.27(14) |
|                 |          | O4-P2-F3        | 108.60(14) |
|                 |          | F4-P2-F3        | 96.89(13)  |

**Table S3** Selected contact distances (Å) and angles (°) in NaDFP.

| bond length (Å) |          | bond angles (°) |            |
|-----------------|----------|-----------------|------------|
| Na1···O2        | 2.316(3) | O2···Na1···O4   | 93.44(11)  |
| Na1···O4        | 2.350(3) | O2···Na1···O3   | 103.66(10) |
| Na1···O3        | 2.392(3) | O2···Na1···O1   | 174.62(10) |
| Na1···O1        | 2.400(3) | O2···Na1···F4   | 78.47(9)   |
| Na1···F4        | 2.847(3) | O4···Na1···O3   | 93.06(11)  |
| Na2···O3        | 2.303(3) | O4···Na1···O1   | 86.96(10)  |
| Na2···O4        | 2.304(3) | O4···Na1···F4   | 152.54(9)  |
| Na2···O1        | 2.364(3) | O3···Na1···O1   | 81.67(9)   |
| Na2···F3        | 2.370(3) | O4···Na1···F4   | 152.54(9)  |
| Na2···F2        | 2.375(3) | O1···Na1···F4   | 98.76(9)   |
|                 |          | O3···Na2···O4   | 138.94(11) |
|                 |          | O3···Na2···O1   | 84.36(9)   |
|                 |          | O3···Na2···F3   | 84.28(10)  |
|                 |          | O3···Na2···F2   | 103.73(9)  |
|                 |          | O4···Na2···O1   | 88.93(10)  |
|                 |          | O4···Na2···F3   | 88.92(11)  |
|                 |          | O4···Na2···F2   | 83.90(9)   |
|                 |          | O1···Na2···F3   | 104.46(10) |
|                 |          | O4···Na2···F2   | 83.90(9)   |
|                 |          | F3···Na2···F2   | 82.25(9)   |

**Table S4** Assignments for the Raman and IR spectra of NaDFP.

| Raman (cm <sup>-1</sup> ) | IR (cm <sup>-1</sup> ) <sup>a</sup> | Assignment <sup>b</sup> (C <sub>2v</sub> )                                                                                                                                    |
|---------------------------|-------------------------------------|-------------------------------------------------------------------------------------------------------------------------------------------------------------------------------|
| 1304                      | 1305 (1330 sh)                      | $\nu_{\text{as}}(\text{PO}_2)$                                                                                                                                                |
| 1140                      | 1146 (1159 sh)                      | $\nu_{\text{s}}(\text{PO}_2)$                                                                                                                                                 |
| 852                       | 863 (880 sh)                        | $\nu_{\text{as}}(\text{PF}_2)$                                                                                                                                                |
| 818                       | 836                                 | $\nu_{\text{s}}(\text{PF}_2) + \text{small } \delta_{\text{s}}(\text{PO}_2)$                                                                                                  |
| 520                       | 499                                 | $\left\{ \begin{array}{l} \delta_{\text{s}}(\text{PF}_2) - \delta_{\text{s}}(\text{PO}_2) \\ \rho_{\text{t}}(\text{PF}_2) - \rho_{\text{w}}(\text{PO}_2) \end{array} \right.$ |
| 502                       |                                     |                                                                                                                                                                               |
| 354                       |                                     | $\delta_{\text{s}}(\text{PF}_2) - \delta_{\text{s}}(\text{PO}_2)$                                                                                                             |
|                           |                                     | $\rho_{\text{t}}(\text{PF}_2) - \rho_{\text{t}}(\text{PO}_2)$                                                                                                                 |

<sup>a</sup>The abbreviation of sh denotes shoulder in the spectrum. <sup>b</sup>The symbols  $\nu_{\text{as}}$ ,  $\nu_{\text{s}}$ ,  $\delta_{\text{s}}$ ,  $\rho_{\text{t}}$ ,  $\rho_{\text{w}}$ , and  $\rho_{\text{t}}$  denote asymmetric stretching, symmetric stretching, scissoring, rocking, wagging, and twisting modes, respectively. See the reference for assignments [K. Matsumoto and R. Hagiwara, *Inorg. Chem.*, 2009, **48**, 7350-7358].

**Table S5** Ionic conductivity ( $\text{mS cm}^{-1}$ ) and the VTF fitting parameters<sup>a</sup> for 1 M NaPF<sub>6</sub>-EC/DMC (1:1, v:v) in neat and with 0.5 wt% and 1 wt% NaDFP and 0.5 wt % and 3 wt % FEC additives. All the fitting data have  $R^2 > 0.99$ .

| Temperature (K) | Concentration                                     |                  |                |                |                   |
|-----------------|---------------------------------------------------|------------------|----------------|----------------|-------------------|
|                 | Neat                                              | 0.5 wt%<br>NaDFP | 1 wt%<br>NaDFP | 0.5 wt%<br>FEC | 3 wt%<br>FEC      |
| 273             | 7.05                                              | 6.84             | 6.80           | 6.96           | 6.91              |
| 283             | 9.13                                              | 9.05             | 9.11           | 9.09           | 9.05              |
| 293             | 11.33                                             | 11.26            | 11.09          | 11.13          | 11.17             |
| 303             | 13.72                                             | 13.80            | 13.96          | 13.35          | 13.64             |
| 313             | 16.12                                             | 16.31            | 16.46          | 16.71          | 16.20             |
| 323             | 18.65                                             | 18.74            | 18.94          | 18.33          | 18.36             |
| 333             | 21.13                                             | 21.00            | 20.46          | 20.11          | 20.66             |
| 343             | 23.45                                             | 23.53            | 23.15          | 22.23          | 22.82             |
| 353             | 25.65                                             | 25.80            | 25.91          | 25.55          | 25.14             |
| Concentration   | $A_\sigma$ ( $\text{mS cm}^{-1} \text{K}^{1/2}$ ) |                  | $B_\sigma$ (K) |                | $T_{0\sigma}$ (K) |
| Neat            | 129                                               |                  | 288            |                | 174               |
| 0.5 wt% NaDFP   | 118                                               |                  | 261            |                | 181               |
| 1 wt% NaDFP     | 113                                               |                  | 251            |                | 183               |
| 0.5 wt% FEC     | 120                                               |                  | 279            |                | 175               |
| 3 wt% FEC       | 108                                               |                  | 248            |                | 183               |

<sup>a</sup>See the references for the Vogel-Tammann-Fulcher (VTF) fitting. [H. Vogel, Phys. Z. 1921, **22**, 645–646. G. S. Fulcher, J. Am. Ceram. Soc. 1925, **8**, 339–355.]

**Table S6** The first charge-discharge capacities and Coulombic efficiencies of the Na/HC cells with 1 M NaPF<sub>6</sub>-EC/DMC (1:1, v:v) electrolytes with and without additives. The charge-discharge current density is 25 mA g<sup>-1</sup>.

| Electrolytes     | Charge capacity<br>(mAh g <sup>-1</sup> ) | Discharge capacity<br>(mAh g <sup>-1</sup> ) | Coulombic efficiency<br>(%) |
|------------------|-------------------------------------------|----------------------------------------------|-----------------------------|
| neat electrolyte | 342                                       | 260                                          | 75.8                        |
| 0.5 wt% NaDFP    | 342                                       | 260                                          | 75.7                        |
| 1 wt% NaDFP      | 342                                       | 260                                          | 76.1                        |
| 0.5 wt% FEC      | 343                                       | 258                                          | 75.1                        |
| 3 wt% FEC        | 344                                       | 256                                          | 74.6                        |

**Table S7.** Fitting results of the EIS for the HC/HC symmetric cells in 1 M NaPF<sub>6</sub>-EC/DMC with different weight ratios of NaDFP or FEC additive at 298 K.

| Electrolyte      |                                         | 1st cycle            | 3rd cycle            | 10th cycle           | 20th cycle           |
|------------------|-----------------------------------------|----------------------|----------------------|----------------------|----------------------|
| neat             | $R_{\text{bulk}} / \Omega$              | 3.2                  | 3.3                  | 3.9                  | 3.8                  |
|                  | $R_{\text{h}} / \Omega$                 | 6.0                  | 7.6                  | 9.6                  | 10.1                 |
|                  | $C.F._{\text{h}} / \text{Hz}$           | 8612                 | 5833                 | 2763                 | 2763                 |
|                  | $Q_{\text{h}} / \text{F s}^{\alpha-1}$  | $3.6 \times 10^{-6}$ | $3.4 \times 10^{-6}$ | $3.4 \times 10^{-6}$ | $3.7 \times 10^{-6}$ |
|                  | $\alpha_{\text{h}}$                     | 1                    | 1                    | 1                    | 1                    |
|                  | $R_{\text{ct}} / \Omega$                | 60.3                 | 64.5                 | 74.2                 | 99.5                 |
|                  | $C.F._{\text{ct}} / \text{Hz}$          | 51.9                 | 51.9                 | 51.9                 | 35.1                 |
|                  | $Q_{\text{ct}} / \text{F s}^{\alpha-1}$ | $0.2 \times 10^{-3}$ | $0.2 \times 10^{-3}$ | $0.2 \times 10^{-3}$ | $0.3 \times 10^{-3}$ |
|                  | $\alpha_{\text{ct}}$                    | 0.7                  | 0.7                  | 0.7                  | 0.7                  |
| 0.5 wt%<br>NaDFP | $R_{\text{bulk}} / \Omega$              | 3.2                  | 2.8                  | 3.2                  | 3.1                  |
|                  | $R_{\text{h}} / \Omega$                 | 5.8                  | 6.0                  | 6.2                  | 6.4                  |
|                  | $C.F._{\text{h}} / \text{Hz}$           | 12763                | 18906                | 18906                | 18906                |
|                  | $Q_{\text{h}} / \text{F s}^{\alpha-1}$  | $3.2 \times 10^{-6}$ | $4.0 \times 10^{-6}$ | $4.6 \times 10^{-6}$ | $3.7 \times 10^{-6}$ |
|                  | $\alpha_{\text{h}}$                     | 1.0                  | 1.0                  | 1.0                  | 0.8                  |
|                  | $R_{\text{ct}} / \Omega$                | 30.8                 | 43.7                 | 47.5                 | 50.4                 |
|                  | $C.F._{\text{ct}} / \text{Hz}$          | 51.9                 | 51.9                 | 51.9                 | 35.1                 |
|                  | $Q_{\text{ct}} / \text{F s}^{\alpha-1}$ | $0.8 \times 10^{-3}$ | $0.5 \times 10^{-3}$ | $0.6 \times 10^{-3}$ | $0.3 \times 10^{-3}$ |
|                  | $\alpha_{\text{ct}}$                    | 0.7                  | 0.7                  | 0.6                  | 0.8                  |
| 1 wt% NaDFP      | $R_{\text{bulk}} / \Omega$              | 3.107                | 3.057                | 3.025                | 3.149                |
|                  | $R_{\text{h}} / \Omega$                 | 3.8                  | 4.1                  | 4.7                  | 4.3                  |
|                  | $C.F._{\text{h}} / \text{Hz}$           | 12763                | 18612                | 18612                | 18612                |
|                  | $Q_{\text{h}} / \text{F s}^{\alpha-1}$  | $4.1 \times 10^{-6}$ | $2.2 \times 10^{-6}$ | $2.6 \times 10^{-6}$ | $2.9 \times 10^{-6}$ |
|                  | $\alpha_{\text{h}}$                     | 1.0                  | 0.8                  | 1.0                  | 1.0                  |
|                  | $R_{\text{ct}} / \Omega$                | 27.9                 | 30.4                 | 31.1                 | 32.8                 |
|                  | $C.F._{\text{ct}} / \text{Hz}$          | 250.4                | 250.4                | 250.4                | 250.4                |
|                  | $Q_{\text{ct}} / \text{F s}^{\alpha-1}$ | $0.7 \times 10^{-3}$ | $0.4 \times 10^{-3}$ | $0.4 \times 10^{-3}$ | $0.5 \times 10^{-3}$ |
|                  | $\alpha_{\text{ct}}$                    | 0.7                  | 0.736 4              | 0.5                  | 0.7                  |
| 0.5 wt% FEC      | $R_{\text{bulk}} / \Omega$              | 4.2                  | 4.6                  | 4.9                  | 4.6                  |
|                  | $R_{\text{h}} / \Omega$                 | 6.6                  | 7.4                  | 8.1                  | 13.4                 |
|                  | $C.F._{\text{h}} / \text{Hz}$           | 12763                | 12959                | 8612                 | 5833                 |
|                  | $Q_{\text{h}} / \text{F s}^{\alpha-1}$  | $4.0 \times 10^{-6}$ | $4.0 \times 10^{-6}$ | $3.7 \times 10^{-6}$ | $2.7 \times 10^{-6}$ |
|                  | $\alpha_{\text{h}}$                     | 1.0                  | 1.0                  | 1.0                  | 1.0                  |
|                  | $R_{\text{ct}} / \Omega$                | 135.2                | 169.7                | 177.3                | 212.5                |
|                  | $C.F._{\text{ct}} / \text{Hz}$          | 23.6                 | 16.8                 | 10.8                 | 4.9                  |
|                  | $Q_{\text{ct}} / \text{F s}^{\alpha-1}$ | $0.2 \times 10^{-3}$ | $0.3 \times 10^{-3}$ | $0.2 \times 10^{-3}$ | $0.3 \times 10^{-3}$ |
|                  | $\alpha_{\text{ct}}$                    | 0.8                  | 0.8                  | 0.8                  | 0.7                  |
| 3 wt% FEC        | $R_{\text{bulk}} / \Omega$              | 5.9                  | 6.7                  | 7.3                  | 8.0                  |
|                  | $R_{\text{h}} / \Omega$                 | 8.0                  | 8.3                  | 12.4                 | 15.3                 |
|                  | $C.F._{\text{h}} / \text{Hz}$           | 12763                | 8763                 | 854                  | 861                  |
|                  | $Q_{\text{h}} / \text{F s}^{\alpha-1}$  | $3.1 \times 10^{-6}$ | $3.2 \times 10^{-6}$ | $4.9 \times 10^{-6}$ | $3.6 \times 10^{-6}$ |
|                  | $\alpha_{\text{h}}$                     | 1.0                  | 1.0                  | 1.0                  | 1.0                  |
|                  | $R_{\text{ct}} / \Omega$                | 159.4                | 209.8                | 231.8                | 292.9                |
|                  | $C.F._{\text{ct}} / \text{Hz}$          | 16.0                 | 11.4                 | 16.3                 | 10.8                 |
|                  | $Q_{\text{ct}} / \text{F s}^{\alpha-1}$ | $0.2 \times 10^{-3}$ | $0.2 \times 10^{-3}$ | $0.2 \times 10^{-3}$ | $0.2 \times 10^{-3}$ |
|                  | $\alpha_{\text{ct}}$                    | 0.8                  | 0.8                  | 0.7                  | 0.7                  |

<sup>a</sup>  $C.F.$ ,  $Q$ , and  $\alpha$  denote characteristic frequency, CPE parameter, and CPE exponent, respectively.



**Table S8** Binding energy and assignments of the XPS results on the HC electrode after 20 cycles in 1 M NaPF<sub>6</sub>-EC/DMC (1:1, v:v) electrolytes with and without additives.

|                | F 1s  |                                                                                        | O 1s  |           | P 2p  |                                                            |
|----------------|-------|----------------------------------------------------------------------------------------|-------|-----------|-------|------------------------------------------------------------|
| Neat           | 686.9 | Na <sub>x</sub> PF <sub>y</sub> / Na <sub>x</sub> PF <sub>y</sub> O <sub>z</sub> (99%) | 533.3 | C–O (36%) | 137.4 | Na <sub>x</sub> PF <sub>y</sub> (96%)                      |
|                | 683.8 | NaF (1%)                                                                               | 531.7 | C=O (64%) | 136.5 |                                                            |
|                |       |                                                                                        |       |           | 134.1 | Na <sub>x</sub> PF <sub>y</sub> O <sub>z</sub> / P–O (4%)  |
|                |       |                                                                                        |       |           | 133.4 |                                                            |
| 3 wt%<br>FEC   | 687.3 | Na <sub>x</sub> PF <sub>y</sub> / Na <sub>x</sub> PF <sub>y</sub> O <sub>z</sub> (88%) | 533.2 | C–O (42%) | 137.7 | Na <sub>x</sub> PF <sub>y</sub> (71%)                      |
|                | 684.0 | NaF (12%)                                                                              | 531.5 | C=O (58%) | 136.8 |                                                            |
|                |       |                                                                                        |       |           | 134.3 | Na <sub>x</sub> PF <sub>y</sub> O <sub>z</sub> / P–O (29%) |
|                |       |                                                                                        |       |           | 133.3 |                                                            |
| 1 wt%<br>NaDFP | 687.1 | Na <sub>x</sub> PF <sub>y</sub> / Na <sub>x</sub> PF <sub>y</sub> O <sub>z</sub> (77%) | 533.1 | C–O (48%) | 137.8 | Na <sub>x</sub> PF <sub>y</sub> (32%)                      |
|                | 683.9 | NaF (23%)                                                                              | 531.6 | C=O (32%) | 136.9 |                                                            |
|                |       |                                                                                        | 530.7 | P–O (20%) | 134.6 | Na <sub>x</sub> PF <sub>y</sub> O <sub>z</sub> / P–O (68%) |
|                |       |                                                                                        |       |           | 133.7 |                                                            |

**Table S9** XPS quantification of elements on the HC electrode after 20 cycles in 1 M NaPF<sub>6</sub>-EC/DMC (1:1, v:v) electrolytes with and without additives.

|             | C  | O  | F  | Na | P |
|-------------|----|----|----|----|---|
| Neat        | 30 | 22 | 16 | 28 | 4 |
| 3 wt% FEC   | 37 | 22 | 17 | 22 | 2 |
| 1 wt% NaDFP | 39 | 23 | 20 | 13 | 6 |

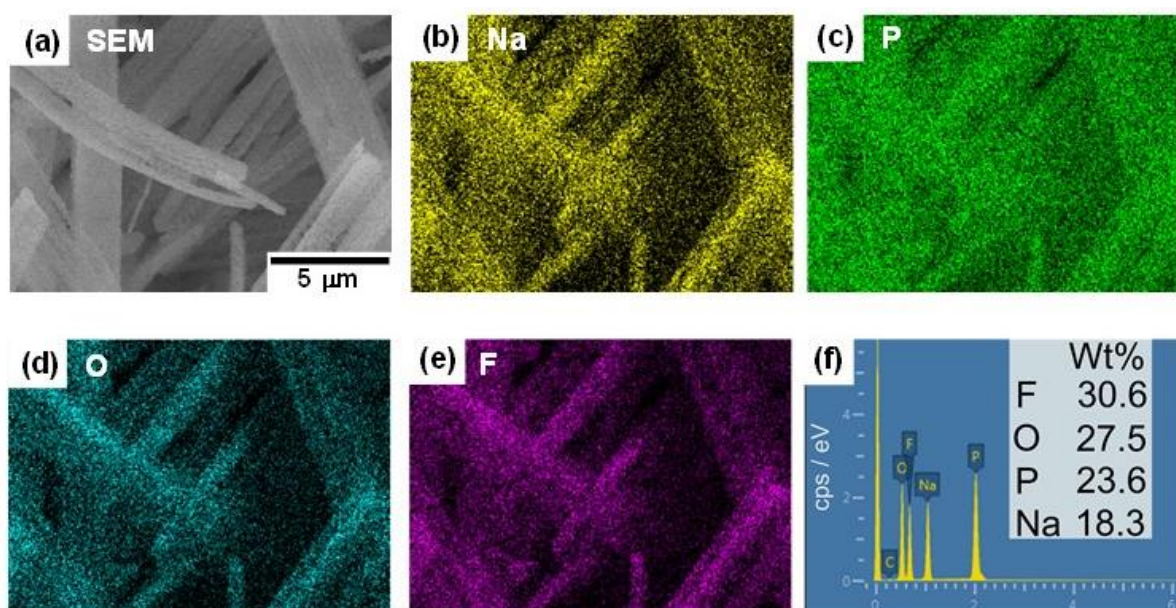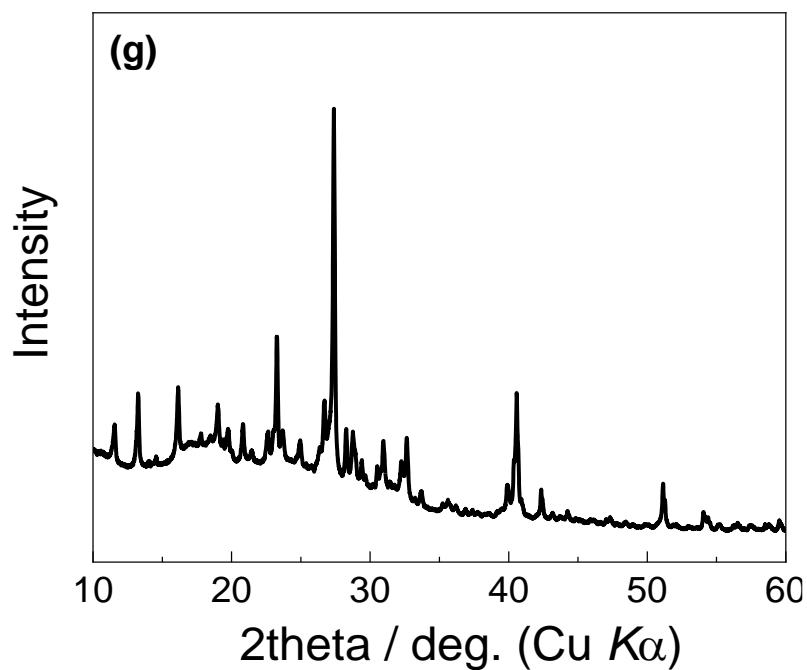

**Fig. S1** (a) SEM image, (b–f) EDX mappings of the elements and the elemental composition present in the prepared NaDFP, and (g) X-ray powder diffraction patterns of the prepared NaDFP.

**Brief comments:** Potassium from the starting material was not detected. The elemental composition of prepared NaDFP and theoretical composition has similar values. (cf. Element: observed vs. theoretical; Na: 18.3 vs. 18.5 wt%, P: 23.6 vs. 25.1 wt%, O: 27.5 vs. 25.8 wt%, and F: 30.6 vs. 30.6 wt%)

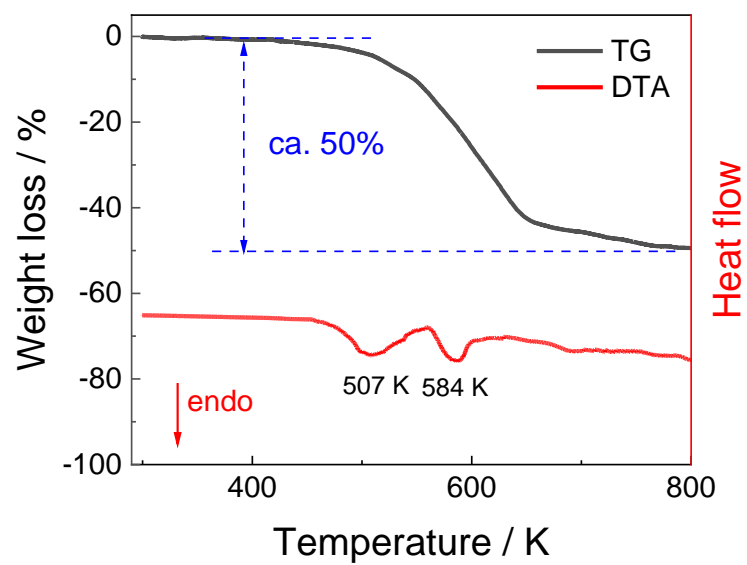

**Fig. S2** The TG-DTA curves of NaDFP. Scan rate: 1 K min<sup>-1</sup>. Atmosphere: dry Ar gas.

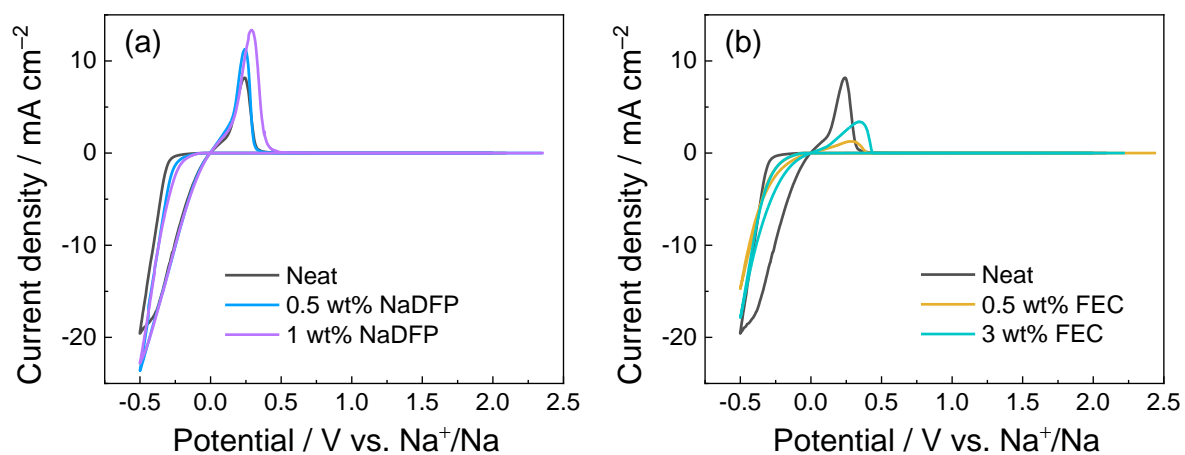

**Fig. S3** Cyclic voltammograms of Al electrodes using 1 M NaPF<sub>6</sub>-EC/DMC (1:1, v:v) with (a) NaDFP and (b) FEC at a scan rate of 5 mV s<sup>-1</sup>. The voltammograms using the neat 1 M NaPF<sub>6</sub>-EC/DMC (1:1, v:v) is shown for comparison. The cathodic and anodic peaks at 0 V vs. Na<sup>+</sup>/Na correspond to the deposition and dissolution of Na metal, respectively.

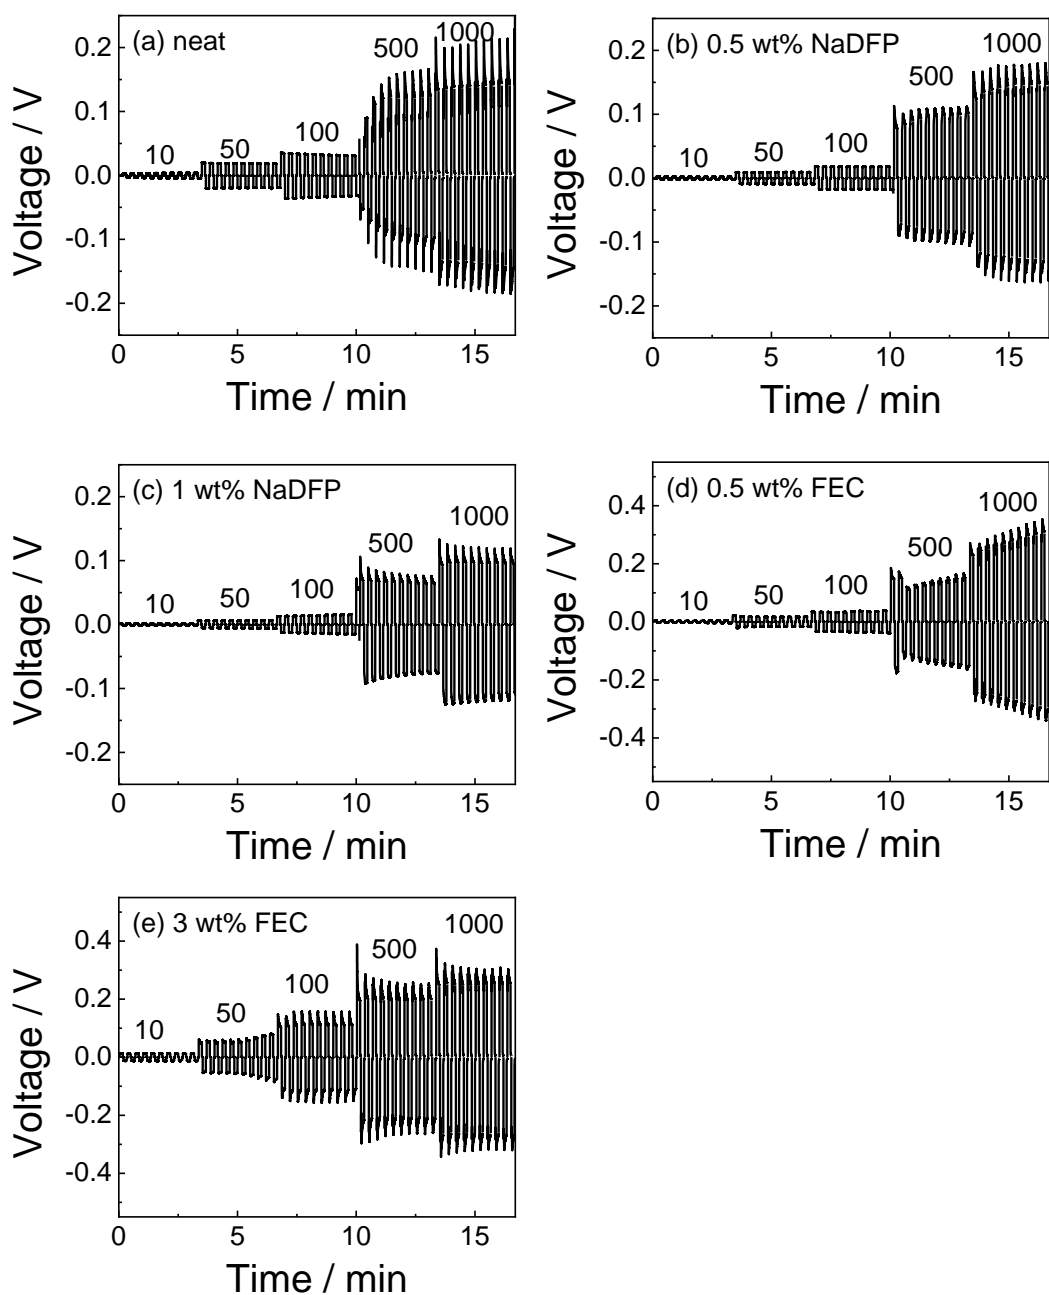

**Fig. S4** Voltage profiles of the Na/Na symmetric cells during galvanostatic Na metal deposition/dissolution using 1 M NaPF<sub>6</sub>-EC/DMC (1:1, v:v) (a) in neat and with (b) 0.5 wt% NaDFP, (c) 1 wt% NaDFP, (d) 0.5 wt% FEC, and (e) 3 wt% FEC. Current densities shown in each panel are in the unit of  $\mu\text{A cm}^{-2}$ .

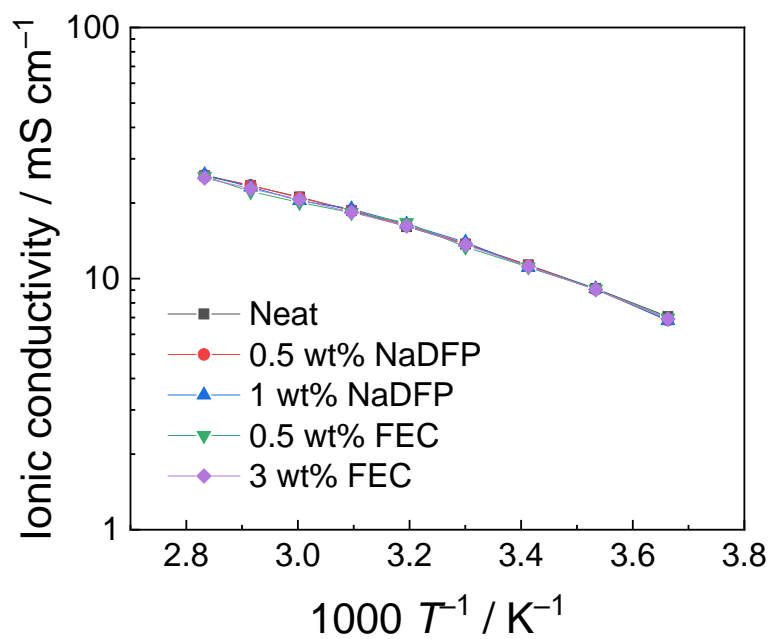

**Fig. S5** Temperature dependence of ionic conductivity for 1 M NaPF<sub>6</sub>-EC/DMC (1:1, v:v) in neat and with 0.5 wt% NaDFP, 1 wt% NaDFP, 0.5 wt % FEC, and 3 wt % FEC additives in the temperature range between 273 and 353 K.

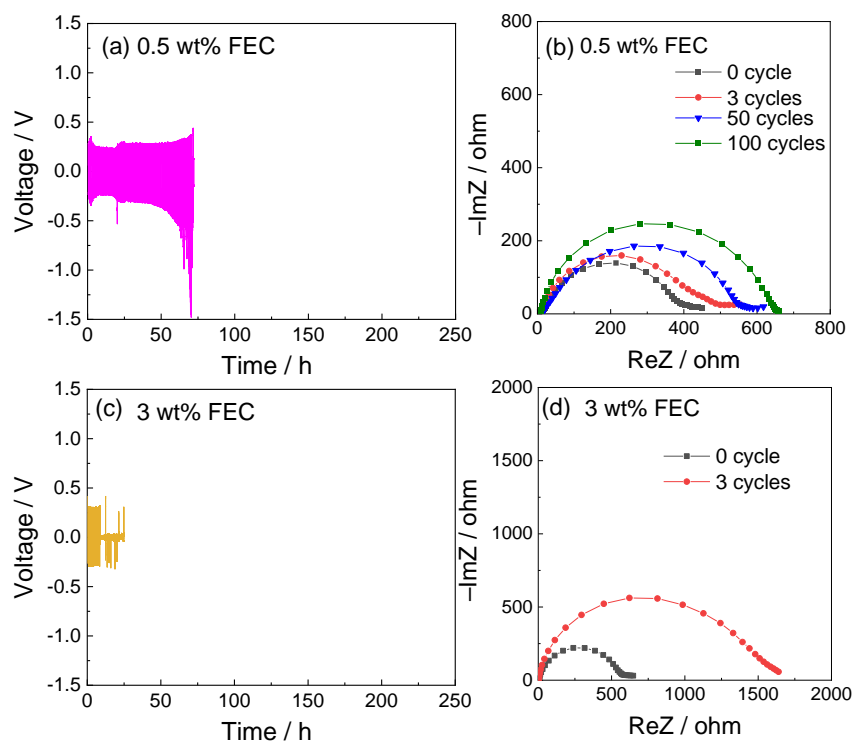

**Fig. S6** Voltage profiles and Nyquist plots of the Na/Na symmetric cells during galvanostatic Na metal deposition/dissolution cycles with (a, b) 0.5 wt% FEC and (c, d) 3 wt% FEC.



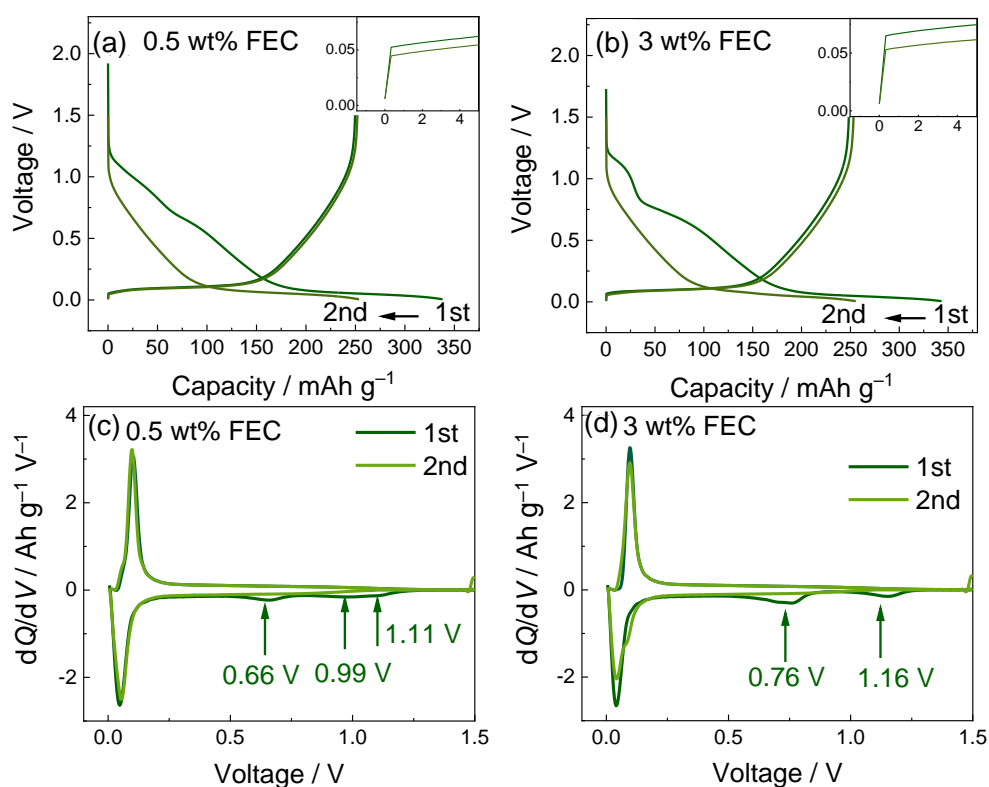

**Fig. S7** Charge-discharge curves and the corresponding  $dQ/dV$  plots of the Na/HC cells using 1 M NaPF<sub>6</sub>-EC/DMC with the (a, c) 0.5 wt% FEC and (b, d) 3 wt% FEC. Current density: 25 mA g<sup>-1</sup>. Cut-off voltage: 0.005–1.5 V.

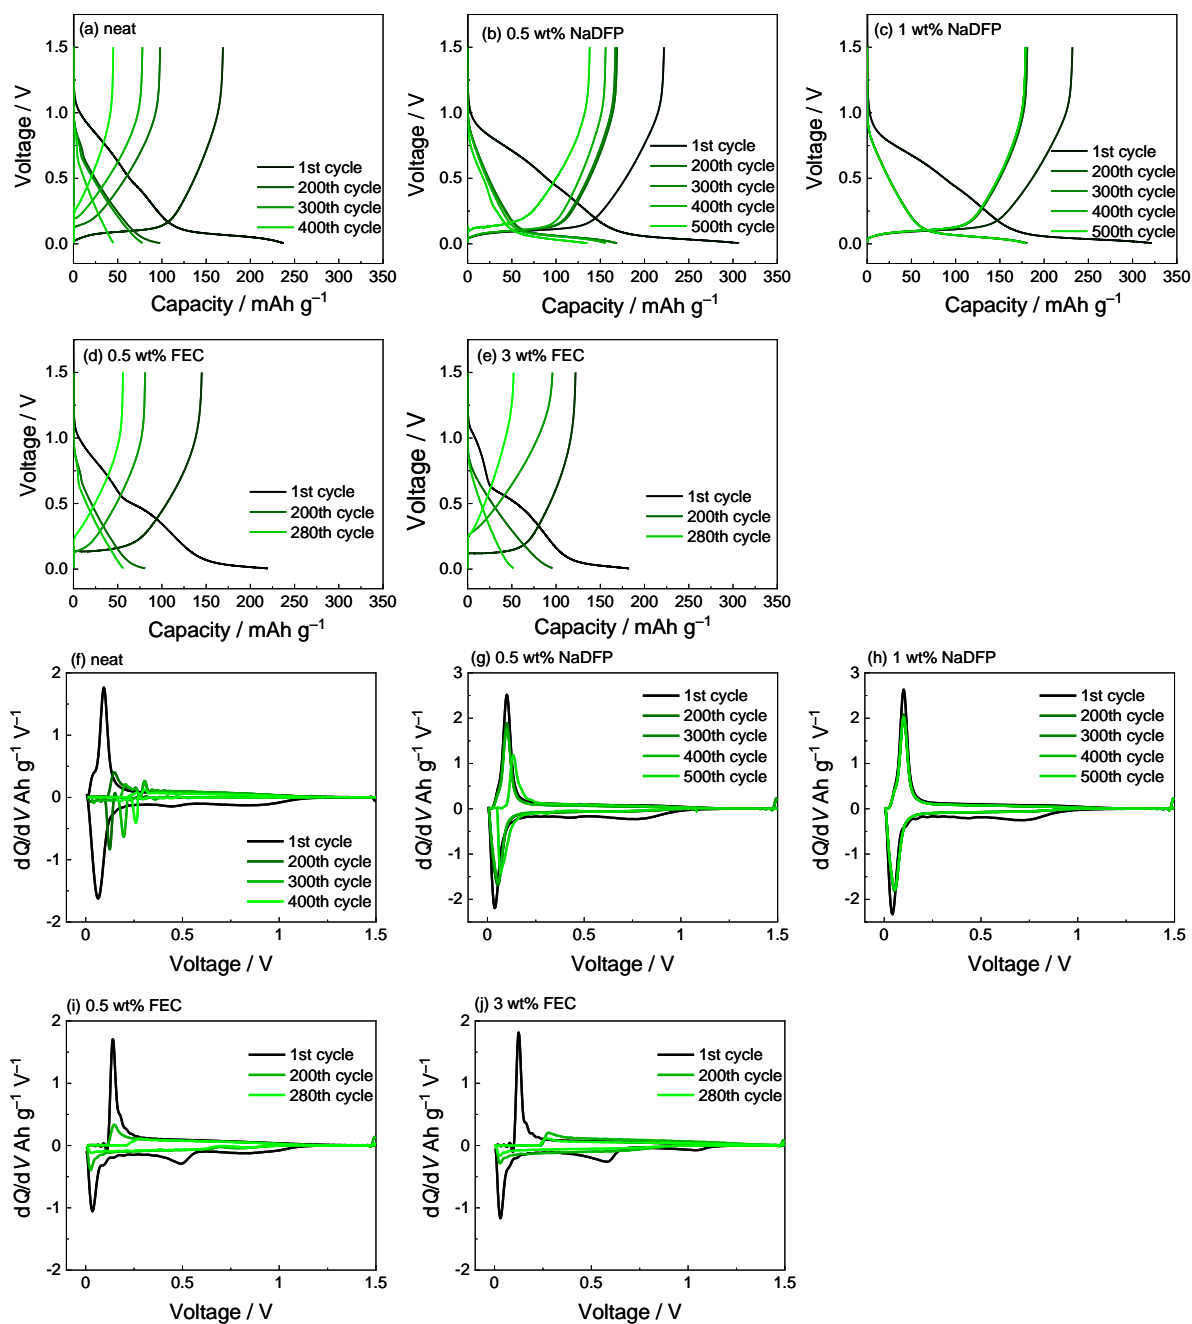

**Fig. S8.** Charge-discharge curves and the corresponding  $dQ/dV$  plots of the Na/HC cells in 1 M NaPF<sub>6</sub>-EC/DMC (1:1, v:v) with (a, f) 0 wt% additive (neat), (b, g) 0.5 wt% NaDFP, (c, h) 1 wt% NaDFP, (d, i) 0.5 wt% FEC, and (e, j) 3 wt% FEC after cycles. Current density: 100 mA g<sup>-1</sup>. Cut-off voltage: 0.005–1.5 V.

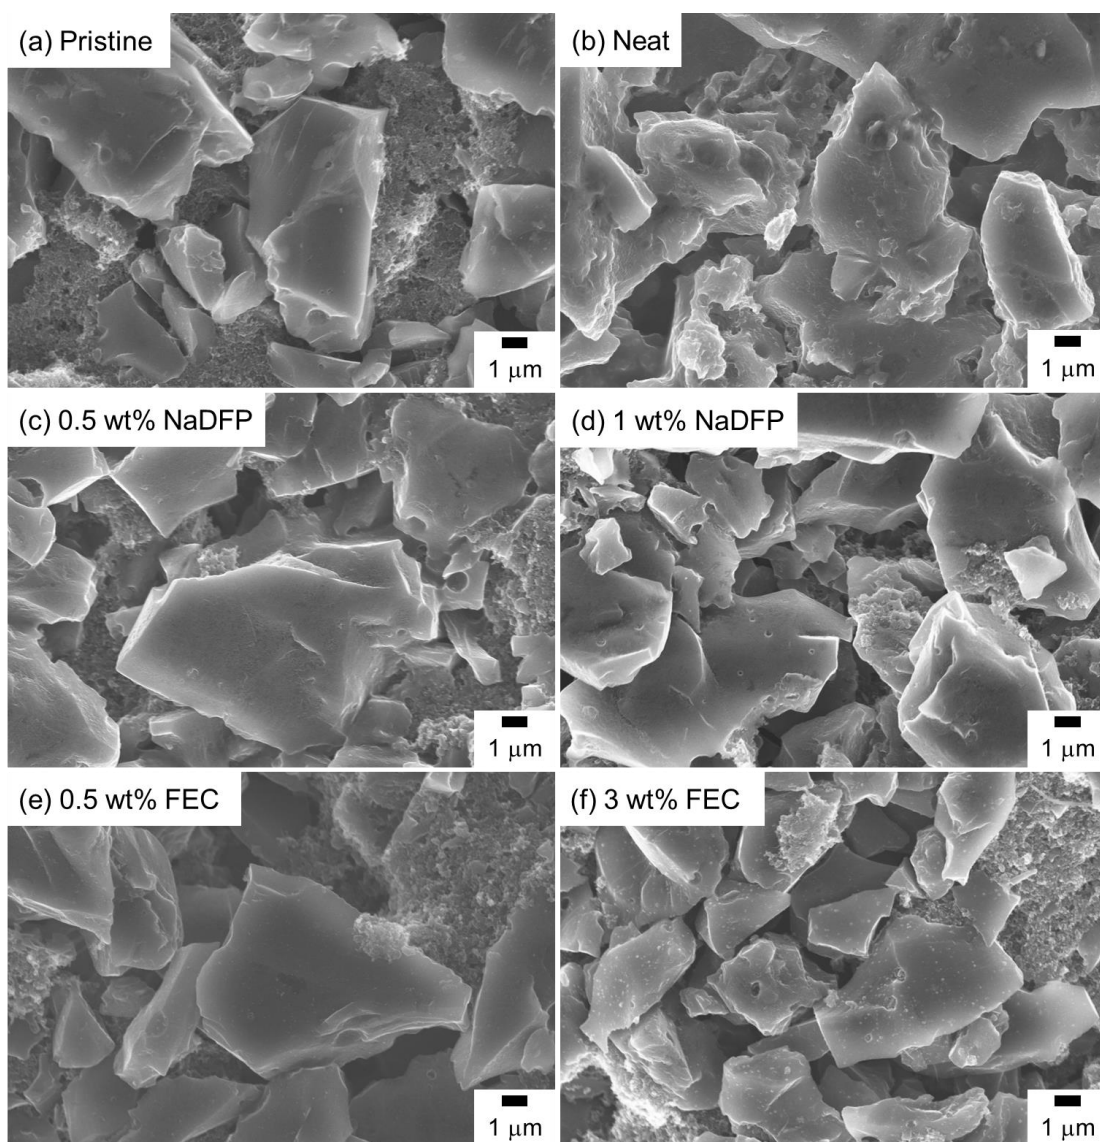

**Fig. S9** Surface SEM images of the HC electrodes, (a) the pristine state and after 3 cycles in 1 M NaPF<sub>6</sub>-EC/DMC (b) in neat and with (c) 0.5 wt% NaDFP, (d) 1 wt% NaDFP, (e) 0.5 wt% FEC, and (f) 3 wt% FEC.

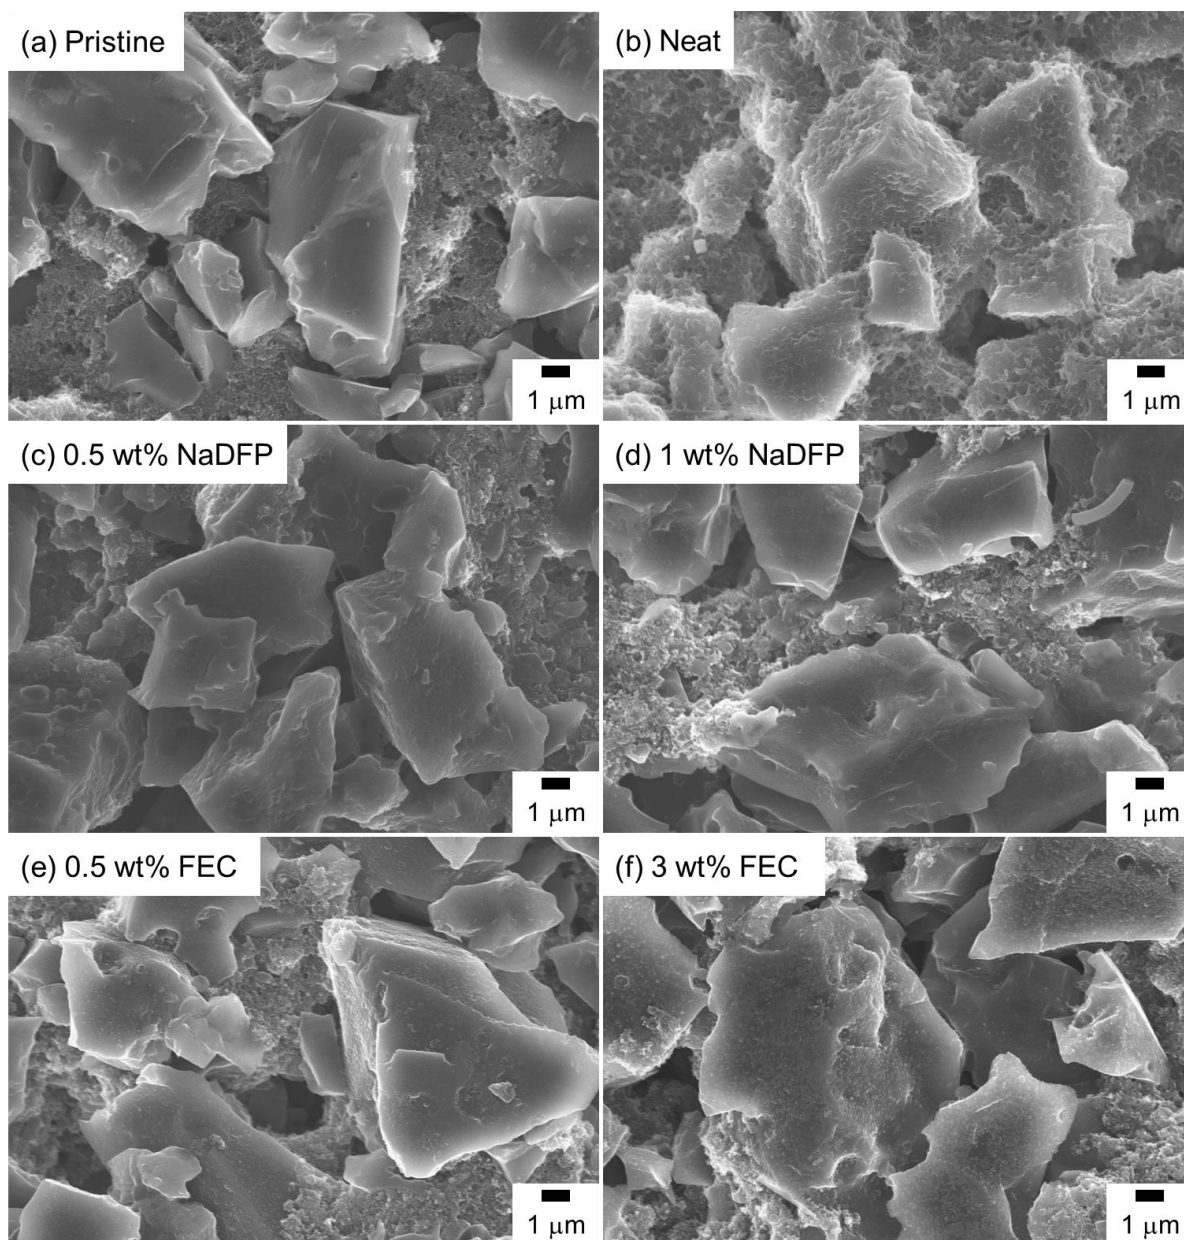

**Fig. S10** Surface SEM images of the HC electrodes, (a) the pristine state and after 20 cycles in 1 M NaPF<sub>6</sub>-EC/DMC (b) in neat and with (c) 0.5 wt% NaDFP, (d) 1 wt% NaDFP, (e) 0.5 wt% FEC, and (f) 3 wt% FEC.

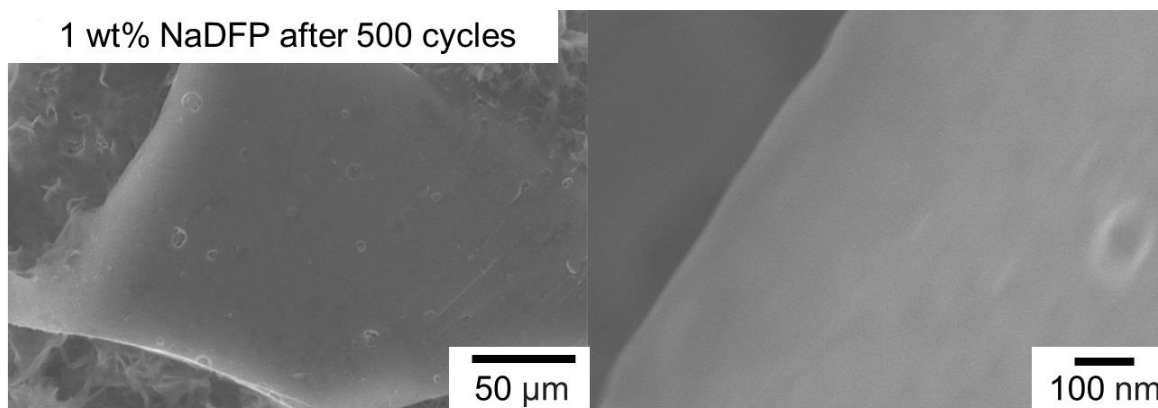

**Fig. S11.** Surface SEM images of the HC electrodes after 500 cycles in 1 M NaPF<sub>6</sub>-EC/DMC (1:1, v:v) with 1 wt% NaDFP.

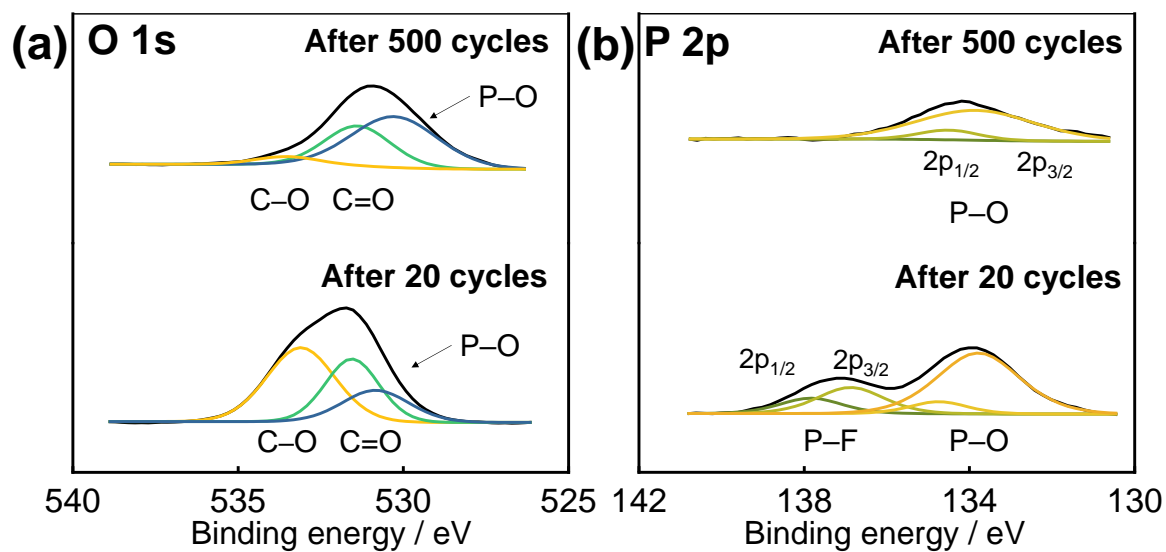

**Fig. S12** Comparison of X-ray photoelectron spectra for the SEI layers formed on the HC electrodes after 20 and 500 cycles in 1 M NaPF<sub>6</sub>-EC/DMC (1:1, v:v) electrolyte with 1 wt% NaDFP. (a) O 1s, and (b) P 2p.
